# Supplementary material for: Linker-Improved Chimeric Endolysin Selectively Kills Staphylococcus aureus In Vitro, on Reconstituted Human Epidermis, and in a Murine Model of Skin Infection
Source: PubMed Central journal article supplement (PMC9112974; doi:10.1128/aac.02273-21), 2022-04-13
Supplement: aac.02273-21-s0001.pdf [file aac.02273-21-s0001.pdf]

## 1 **Supplementary Material**

2

### 3 **A**

4 MAATHEHSAQWLNNYKKGYPYPLGINGGMHYGVDFMNIPTVKAISSGKIVEAGWSNYGGGNQIGLIENDGV  
5 HRQWYMHLSKYNVKGVDYVKAGQIIGWSGSTGYSTAPHLHFQRMVNSFSNSTAQDPMPLKSAGYKAGGTVTPT  
6 PNTGELLRPKDAKKDEKSQVCSGLAMEKYDITNLNAKQDKSKNGSVKELKHIYSNHIKGNKITAPKPSIQGVVIHNDYGS  
7 MTPSQYLPWLYARENNGTHVNGWASVYANRNEVLWYHPTDYVEWHCGNQWANANLIGFEVCESYPGRISDKLFLE  
8 NEEATLKVAADVMKSYGLPVNRNTVRLHNEFFGTSCPHRSWDLHVGKGEPYTTTNINKMKDYFIKRIKHYYDGGKLEV  
9 SKAATIKQSDVKQEVKKQEAQIVKATDWWQNKDGIWYKAEHASFTVTAPEGIITRYKGPWTGHPQAGVLQKGQTIKY  
10 DEVQKFDGHVWVSWETFEGETVYMPVRTWDAKTGKVGKLVGEIK

11

### 12 **B**

13 MAATHEHSAQWLNNYKKGYPYPLGINGGMHYGVDFMNIPTVKAISSGKIVEAGWSNYGGGNQIGLIENDGV  
14 HRQWYMHLSKYNVKGVDYVKAGQIIGWSGSTGYSTAPHLHFQRMVNSFSNSTAQDPMPLKSAGYKAGGTVTPT  
15 PNTGLKHIYSNHIKGNKITAPKPSIQGVVIHNDYGSMTPSQYLPWLYARENNGTHVNGWASVYANRNEVLWYHPTDY  
16 VEWHCGNQWANANLIGFEVCESYPGRISDKLFLENEEATLKVAADVMKSYGLPVNRNTVRLHNEFFGTSCPHRSWDL  
17 HVGKGEPYTTTNINKMKDYFIKRIKHYYDGGKLEVSKAATIKQSDVKQEVKKQEAQIVKATDWWQNKDGIWYKAEHA  
18 SFTVTAPEGIITRYKGPWTGHPQAGVLQKGQTIKYDEVQKFDGHVWVSWETFEGETVYMPVRTWDAKTGKVGKLV  
19 GEIK

20

### 21 **Supplementary Figure 1:**

22 Amino acid sequences of the chimeric enzymes SA.100 (**A**) and XZ.700 (**B**). The 44 amino acid  
23 region that has been deleted in XZ.700 as compared to SA.100 is underlined in panel A.  
24 Lysostaphin-derived sequence portions are displayed in green, whereas those originating from  
25 staphylococcal phage endolysin Ply2638 are shown in orange/gold. The conserved M23 domain  
26 of lysostaphin, the amidase domain of Ply2638, and the SH3b domain of Ply2638 are displayed  
27 in dark green, gold, and dark gold, respectively. The amino acids “EL” shown in red in panel A  
28 are derived from the SacI restriction site that had been used during cloning for generation of  
29 SA.100.

30

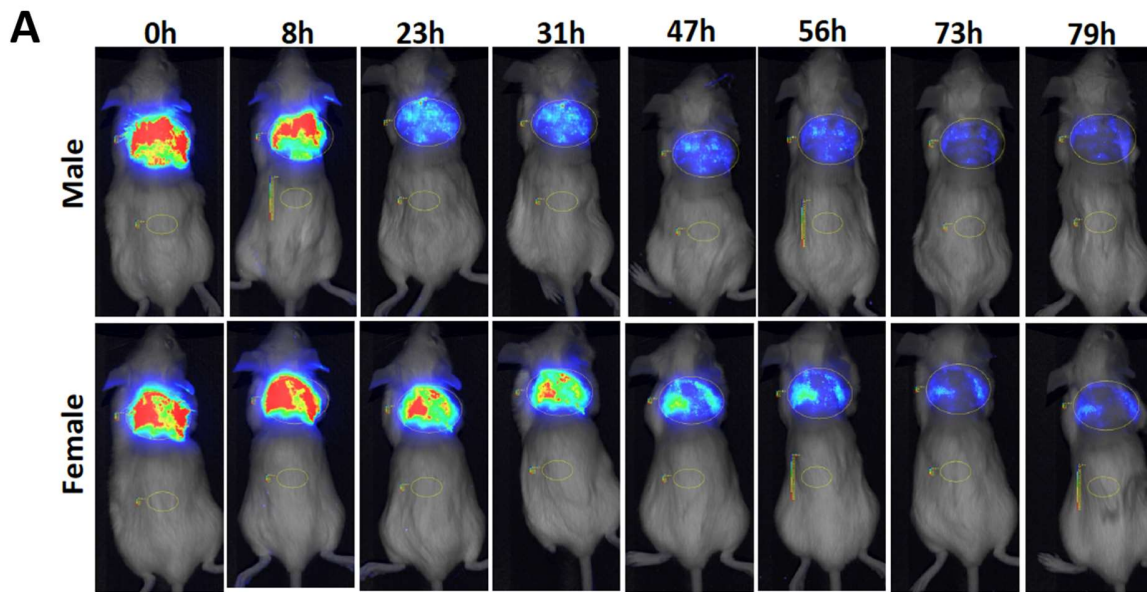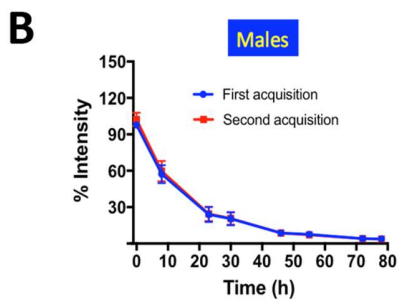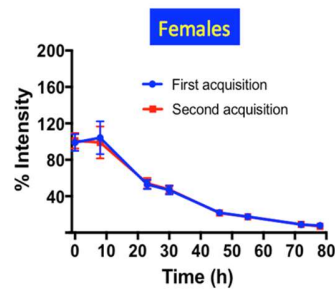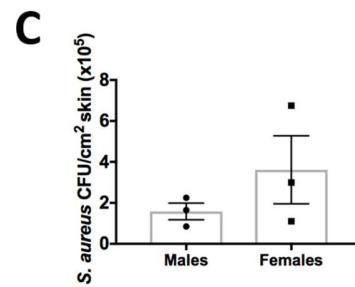

31

32 **Supplementary Figure 2:**

33 Clearance of *S. aureus* over time from the skin of tape-stripped male and female mice. **(A)**

34 Representative bioluminescence images illustrating the concentration of *S. aureus* on male and

35 female mice immediately after infection (t = 0h) and for up to 79 h. **(B)** Quantification of

36 luminescence intensity over time obtained from images as exemplified in panel A (n = 3). **(C)** *S.*

37 *aureus* CFU counts/cm<sup>2</sup> on male and female mice at 79 h after infection (n = 3).

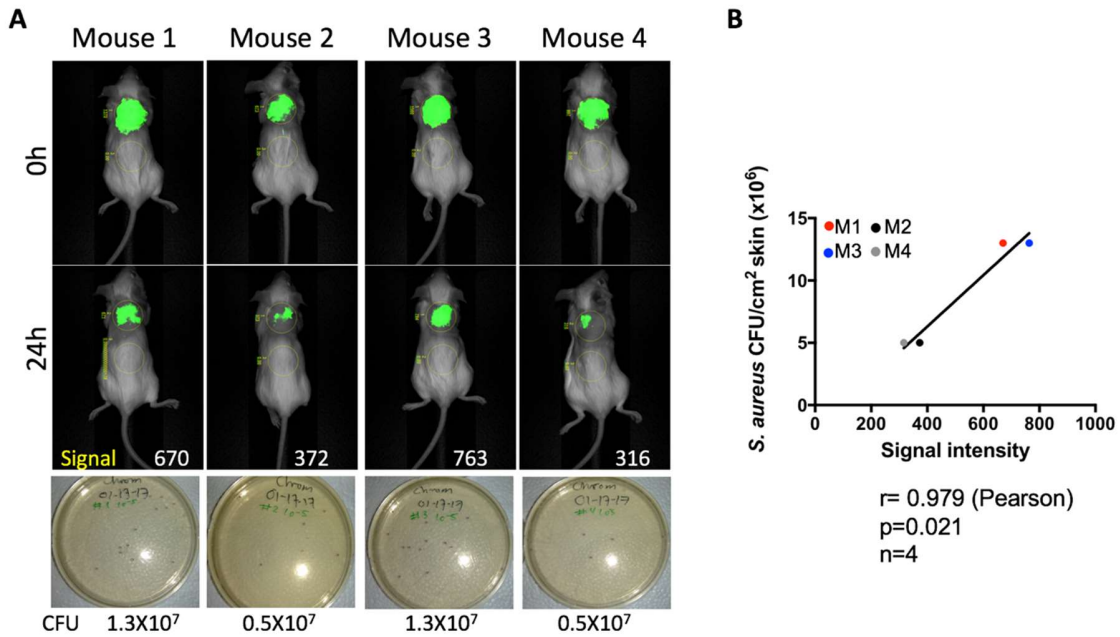

38 **Supplementary Figure 3:**

39 Correlation between bioluminescence signal intensity and CFU counts from skin homogenates  
 40 24 h after superficial *S. aureus* infection. **A.** Representative bioluminescence images of tape-  
 41 stripped mice infected with the bioluminescent *S. aureus* strain USA300 LAC::*lux* immediately  
 42 (0h) and 24 h after superficial infection (24h) and CFU counts in homogenates obtained at 24 h.  
 43 **B.** Correlation plot between bioluminescence signal intensity and CFU counts from skin  
 44 homogenates at 24 h.

45

46 **Supplementary Table 1: Minimum inhibitory concentrations (MICs) of XZ.700 against**  
47 **multiple *Staphylococcus aureus* (MSSA and MRSA) and non-*S. aureus* (control) strains**  
48 **from different geographic regions (n = 1)**

| No. | Isolate ID     | Category | Species                      | Origin         | Country         | Remarks        | XZ.700 MIC<br>(µg/ml) |
|-----|----------------|----------|------------------------------|----------------|-----------------|----------------|-----------------------|
| 1   | 161227024501-1 | MSSA     | <i>Staphylococcus aureus</i> | blood          | The Netherlands |                | 2                     |
| 2   | 161227017901-1 | MSSA     | <i>Staphylococcus aureus</i> | blood          | The Netherlands |                | 4                     |
| 3   | 170201053701-1 | MSSA     | <i>Staphylococcus aureus</i> | blood          | The Netherlands | Fucidic acid R | 2                     |
| 4   | 170303020801-1 | MSSA     | <i>Staphylococcus aureus</i> | blood          | The Netherlands | Fucidic acid R | 2                     |
| 5   | 170601022701-1 | MSSA     | <i>Staphylococcus aureus</i> | blood          | The Netherlands | Fucidic acid R | 4                     |
| 6   | 170609021401-1 | MSSA     | <i>Staphylococcus aureus</i> | blood          | The Netherlands | Fucidic acid R | 2                     |
| 7   | 170814016001-1 | MSSA     | <i>Staphylococcus aureus</i> | blood          | The Netherlands |                | 8                     |
| 8   | 170529015901-1 | MSSA     | <i>Staphylococcus aureus</i> | blood          | The Netherlands |                | 8                     |
| 9   | 170527001701-1 | MSSA     | <i>Staphylococcus aureus</i> | blood          | The Netherlands |                | 2                     |
| 10  | 170511026901-1 | MSSA     | <i>Staphylococcus aureus</i> | blood          | The Netherlands |                | 0.5                   |
| 11  | 170526061901-1 | MSSA     | <i>Staphylococcus aureus</i> | blood          | The Netherlands |                | 4                     |
| 12  | 170102033901-1 | MSSA     | <i>Staphylococcus aureus</i> | burn wound     | The Netherlands |                | 8                     |
| 13  | 161230032701-3 | MSSA     | <i>Staphylococcus aureus</i> | burn wound     | The Netherlands | Fucidic acid R | 8                     |
| 14  | 161229022501-3 | MSSA     | <i>Staphylococcus aureus</i> | burn wound     | The Netherlands | Fucidic acid R | 4                     |
| 15  | 170105033301-1 | MSSA     | <i>Staphylococcus aureus</i> | burn wound     | The Netherlands | Fucidic acid R | 4                     |
| 16  | 170223065201-1 | MSSA     | <i>Staphylococcus aureus</i> | burn wound     | The Netherlands | Fucidic acid R | 2                     |
| 17  | 170619040001-1 | MSSA     | <i>Staphylococcus aureus</i> | burn wound     | The Netherlands | Fucidic acid R | 2                     |
| 18  | 170220026901-1 | MSSA     | <i>Staphylococcus aureus</i> | burn wound     | The Netherlands | Fucidic acid R | 2                     |
| 19  | 170406066601-3 | MSSA     | <i>Staphylococcus aureus</i> | burn wound     | The Netherlands | Fucidic acid R | 2                     |
| 20  | 170526034401-1 | MSSA     | <i>Staphylococcus aureus</i> | burn wound     | The Netherlands | Fucidic acid R | 2                     |
| 21  | 170907064201-2 | MSSA     | <i>Staphylococcus aureus</i> | burn wound     | The Netherlands | Fucidic acid R | 2                     |
| 22  | 170814035601-1 | MSSA     | <i>Staphylococcus aureus</i> | burn wound     | The Netherlands |                | 8                     |
| 23  | 170815032601-1 | MSSA     | <i>Staphylococcus aureus</i> | burn wound     | The Netherlands |                | 4                     |
| 24  | 170720049601-1 | MSSA     | <i>Staphylococcus aureus</i> | burn wound     | The Netherlands |                | 2                     |
| 25  | 170608049201-1 | MSSA     | <i>Staphylococcus aureus</i> | burn wound     | The Netherlands |                | 2                     |
| 26  | 170426041401-1 | MSSA     | <i>Staphylococcus aureus</i> | burn wound     | The Netherlands |                | 2                     |
| 27  | 170810033801-1 | MSSA     | <i>Staphylococcus aureus</i> | joint aspirate | The Netherlands |                | 2                     |
| 28  | 161229029801-1 | MSSA     | <i>Staphylococcus aureus</i> | joint aspirate | The Netherlands |                | 4                     |

|    |                |      |                              |                 |                 |                |    |
|----|----------------|------|------------------------------|-----------------|-----------------|----------------|----|
| 29 | 171025047001-1 | MSSA | <i>Staphylococcus aureus</i> | nose            | The Netherlands |                | 1  |
| 30 | 171025046701-1 | MSSA | <i>Staphylococcus aureus</i> | nose            | The Netherlands |                | 8  |
| 31 | 171025046301-1 | MSSA | <i>Staphylococcus aureus</i> | nose            | The Netherlands |                | 4  |
| 32 | 171025046101-1 | MSSA | <i>Staphylococcus aureus</i> | nose            | The Netherlands |                | 4  |
| 33 | 171025046001-1 | MSSA | <i>Staphylococcus aureus</i> | nose            | The Netherlands |                | 2  |
| 34 | 171025045901-1 | MSSA | <i>Staphylococcus aureus</i> | nose            | The Netherlands |                | 4  |
| 35 | 171026037301-1 | MSSA | <i>Staphylococcus aureus</i> | nose            | The Netherlands | Fucidic acid R | 4  |
| 36 | 170201064901-1 | MSSA | <i>Staphylococcus aureus</i> | pleural empyema | The Netherlands |                | 8  |
| 37 | AZP17-17350    | MSSA | <i>Staphylococcus aureus</i> | pus             | Surinam         |                | 4  |
| 38 | 170823027001-1 | MSSA | <i>Staphylococcus aureus</i> | pus             | The Netherlands |                | 8  |
| 39 | 171003056101-1 | MSSA | <i>Staphylococcus aureus</i> | skin            | The Netherlands | Fucidic acid R | 2  |
| 40 | 150909037501-1 | MSSA | <i>Staphylococcus aureus</i> | skin            | The Netherlands | Fucidic acid I | 2  |
| 41 | 150911021401-1 | MSSA | <i>Staphylococcus aureus</i> | skin            | The Netherlands | Fucidic acid I | 1  |
| 42 | 151010019801-1 | MSSA | <i>Staphylococcus aureus</i> | skin            | The Netherlands | Fucidic acid R | 2  |
| 43 | 160505000401-1 | MSSA | <i>Staphylococcus aureus</i> | skin            | The Netherlands |                | 4  |
| 44 | 17072040301-1  | MSSA | <i>Staphylococcus aureus</i> | sputum          | The Netherlands | Mupirocin R    | 2  |
| 45 | 170424029401-1 | MSSA | <i>Staphylococcus aureus</i> | sputum          | The Netherlands |                | 2  |
| 46 | 170606037501-1 | MSSA | <i>Staphylococcus aureus</i> | tissue          | The Netherlands |                | 2  |
| 47 | AZP17-17255    | MSSA | <i>Staphylococcus aureus</i> | wound           | Surinam         |                | 8  |
| 48 | AZP17-17343    | MSSA | <i>Staphylococcus aureus</i> | wound           | Surinam         |                | 4  |
| 49 | 151030042101-1 | MSSA | <i>Staphylococcus aureus</i> | wound           | The Netherlands |                | 16 |
| 50 | 170202069101-1 | MSSA | <i>Staphylococcus aureus</i> | wound           | The Netherlands | Fucidic acid R | 4  |
| 51 | 150617038301   | MRSA | <i>Staphylococcus aureus</i> | abscess         | Nepal           |                | 8  |
| 52 | 161230032901   | MRSA | <i>Staphylococcus aureus</i> | abscess         | Philippines     |                | 4  |
| 53 | AZP17-2341     | MRSA | <i>Staphylococcus aureus</i> | blood           | Surinam         |                | 2  |
| 54 | AZP17-4053     | MRSA | <i>Staphylococcus aureus</i> | blood           | Surinam         |                | 2  |
| 55 | AZP17-9084     | MRSA | <i>Staphylococcus aureus</i> | blood           | Surinam         |                | 4  |
| 56 | AZP17-12179    | MRSA | <i>Staphylococcus aureus</i> | CVC             | Surinam         |                | 4  |
| 57 | 160803033901   | MRSA | <i>Staphylococcus aureus</i> | nose            | Australia       |                | 2  |
| 58 | 160629065801   | MRSA | <i>Staphylococcus aureus</i> | nose            | Germany         |                | 8  |
| 59 | 160908063801   | MRSA | <i>Staphylococcus aureus</i> | nose            | Greece          |                | 4  |
| 60 | 160915040201   | MRSA | <i>Staphylococcus aureus</i> | nose            | Malaysia        |                | 16 |
| 61 | 150324048101   | MRSA | <i>Staphylococcus aureus</i> | nose            | Spain           |                | 2  |
| 62 | 160106044001   | MRSA | <i>Staphylococcus aureus</i> | nose            | Syria           |                | 2  |
| 63 | 170217039601   | MRSA | <i>Staphylococcus aureus</i> | nose            | Syria           |                | 4  |

|    |              |      |                              |          |                  |    |
|----|--------------|------|------------------------------|----------|------------------|----|
| 64 | 170502030101 | MRSA | <i>Staphylococcus aureus</i> | nose     | Syria            | 4  |
| 65 | 161108035601 | MRSA | <i>Staphylococcus aureus</i> | nose     | Turkey           | 2  |
| 66 | 161108082901 | MRSA | <i>Staphylococcus aureus</i> | nose     | Turkey           | 2  |
| 67 | 170404051901 | MRSA | <i>Staphylococcus aureus</i> | perineum | Afghanistan      | 4  |
| 68 | 160803058501 | MRSA | <i>Staphylococcus aureus</i> | perineum | Germany          | 2  |
| 69 | 160924029101 | MRSA | <i>Staphylococcus aureus</i> | perineum | Hungary          | 2  |
| 70 | 170303041501 | MRSA | <i>Staphylococcus aureus</i> | perineum | Syria            | 4  |
| 71 | 150430043601 | MRSA | <i>Staphylococcus aureus</i> | pus      | Thailand         | 2  |
| 72 | 160607046301 | MRSA | <i>Staphylococcus aureus</i> | skin     | Aruba            | 2  |
| 73 | 151027058901 | MRSA | <i>Staphylococcus aureus</i> | skin     | Czech Republic   | 8  |
| 74 | 150212029501 | MRSA | <i>Staphylococcus aureus</i> | skin     | India            | 4  |
| 75 | 151103048201 | MRSA | <i>Staphylococcus aureus</i> | skin     | Syria            | 4  |
| 76 | 160425057101 | MRSA | <i>Staphylococcus aureus</i> | skin     | Turkey           | 8  |
| 77 | 150430030901 | MRSA | <i>Staphylococcus aureus</i> | throat   | China            | 8  |
| 78 | 160802055501 | MRSA | <i>Staphylococcus aureus</i> | throat   | Eritrea          | 1  |
| 79 | 150522023601 | MRSA | <i>Staphylococcus aureus</i> | throat   | France           | 4  |
| 80 | 170329039701 | MRSA | <i>Staphylococcus aureus</i> | throat   | Iraq             | 4  |
| 81 | 160622066901 | MRSA | <i>Staphylococcus aureus</i> | throat   | Italy            | 4  |
| 82 | 160605006101 | MRSA | <i>Staphylococcus aureus</i> | throat   | South-Africa     | 16 |
| 83 | 151026035501 | MRSA | <i>Staphylococcus aureus</i> | throat   | Spain            | 2  |
| 84 | AZP17-10788  | MRSA | <i>Staphylococcus aureus</i> | throat   | Surinam          | 2  |
| 85 | 160517038601 | MRSA | <i>Staphylococcus aureus</i> | throat   | Syria            | 4  |
| 86 | 160115043001 | MRSA | <i>Staphylococcus aureus</i> | throat   | Turkey           | 2  |
| 87 | 170307028901 | MRSA | <i>Staphylococcus aureus</i> | throat   | Turkey           | 4  |
| 88 | 161112028101 | MRSA | <i>Staphylococcus aureus</i> | vagina   | Egypt            | 16 |
| 89 | 151015030201 | MRSA | <i>Staphylococcus aureus</i> | wound    | Curacao          | 4  |
| 90 | 160909069801 | MRSA | <i>Staphylococcus aureus</i> | wound    | Germany          | 8  |
| 91 | 150409053401 | MRSA | <i>Staphylococcus aureus</i> | wound    | Indonesia (Bali) | 8  |
| 92 | 150910021801 | MRSA | <i>Staphylococcus aureus</i> | wound    | Morocco          | 16 |
| 93 | 160920041601 | MRSA | <i>Staphylococcus aureus</i> | wound    | Papua-NG         | 8  |
| 94 | 150826040101 | MRSA | <i>Staphylococcus aureus</i> | wound    | Philippines      | 2  |
| 95 | 170124065101 | MRSA | <i>Staphylococcus aureus</i> | wound    | Spain            | 4  |
| 96 | AZP17-11421  | MRSA | <i>Staphylococcus aureus</i> | wound    | Surinam          | 2  |
| 97 | AZP17-5000   | MRSA | <i>Staphylococcus aureus</i> | wound    | Surinam          | 4  |
| 98 | 160827011901 | MRSA | <i>Staphylococcus aureus</i> | wound    | Vietnam          | 4  |

|     |                |         |                                        |                  |                 |      |
|-----|----------------|---------|----------------------------------------|------------------|-----------------|------|
| 99  | ATCCBAA-1717   | MRSA    | <i>Staphylococcus aureus</i>           | PFGE: USA300     | ATCCBAA-1717    | 4    |
| 100 | ATCCBAA-1707   | MRSA    | <i>Staphylococcus aureus</i>           | PFGE: USA400     | ATCCBAA-1707    | 4    |
| 101 | 160316027101-1 | Control | <i>Corynebacterium jeikeium</i>        | blood            | The Netherlands | >256 |
| 102 | 160312011601-1 | Control | <i>Cutibacterium acnes</i>             | blood/skin*      | The Netherlands | >256 |
| 103 | 160222049101-1 | Control | <i>Saccharomyces cerevisiae</i>        | quality control  | The Netherlands | >256 |
| 104 | 170814016001-2 | Control | <i>Staphylococcus capitis</i>          | blood            | The Netherlands | >256 |
| 105 | 160314033401-1 | Control | <i>Staphylococcus capitis</i>          | skin             | The Netherlands | >256 |
| 106 | 151230040701-1 | Control | <i>Staphylococcus chromogenes</i>      | mastitis (cow)** | The Netherlands | <2   |
| 107 | 161111065901-1 | Control | <i>Staphylococcus cohnii</i>           | quality control  | The Netherlands | >256 |
| 108 | 170829020401-1 | Control | <i>Staphylococcus epidermidis</i>      | blood            | The Netherlands | >256 |
| 109 | 170820000801-1 | Control | <i>Staphylococcus epidermidis</i>      | blood            | The Netherlands | >256 |
| 110 | 170810016301-1 | Control | <i>Staphylococcus epidermidis</i>      | liquor           | The Netherlands | >256 |
| 111 | 170813003801-1 | Control | <i>Staphylococcus hominis</i>          | blood            | The Netherlands | >256 |
| 112 | 170815015301-1 | Control | <i>Staphylococcus hominis</i>          | blood            | The Netherlands | >256 |
| 113 | 170810020301-1 | Control | <i>Staphylococcus hominis</i>          | blood            | The Netherlands | >256 |
| 114 | 170113059301-1 | Control | <i>Staphylococcus lugdunensis</i>      | joint aspirate   | The Netherlands | 8    |
| 115 | 170824024501   | Control | <i>Staphylococcus lugdunensis</i>      | tissue           | The Netherlands | 8    |
| 116 | 170510045101-1 | Control | <i>Staphylococcus lugdunensis</i>      | urine            | The Netherlands | 8    |
| 117 | 140425015259-3 | Control | <i>Staphylococcus pseudintermedius</i> | wound (dog)      | The Netherlands | <2   |
| 118 | 140425015271-4 | Control | <i>Staphylococcus pseudintermedius</i> | wound (dog)      | The Netherlands | <2   |
| 119 | 140528015136-2 | Control | <i>Staphylococcus pseudintermedius</i> | wound (dog)      | The Netherlands | <2   |
| 120 | 170627038701-1 | Control | <i>Staphylococcus warneri</i>          | quality control  | The Netherlands | >256 |

---

49

50 \* Skin contaminant in blood culture bottle.

51 \*\* Culture of udder of cow with mastitis.
